# Supplementary material for: Body Mass Index Is Associated with Gene Methylation in Estrogen Receptor–Positive Breast Tumors
Source: Oxford University Press journal article supplement (doi:10.1158/1055-9965.epi-14-1017), 2015-01-13
Supplement: 10559965epi141017-sup-137012_1_supp_2737498_n7ty9n.xlsx [file 10559965epi141017-sup-137012_1_supp_2737498_n7ty9n.xlsx]

## Sheet: TCGA methyl_corr_expression
Supplemental Table. Correlation between BMI-associated methylation sites (overall and among ER-positive tumors) and gene expression in breast tumors from The Cancer Genome Atlas (TCGA)
								TCGA Tumors (n = 581)		Hormone-Receptor Positive Tumors (n=391)
Gene ID	CHR	450K Probe ID	450K Build 36 Location	GG Probe ID	Closest GG Build 36 Location	450k bp Distance from GG Probe	CpG Island	Correlation	p-value	Correlation	p-value
ABO	9	cg13506600	135140182	ABO_E110_F	135140341	159	Yes	-0.327786	<0.0001	-0.263451	<0.0001
ARHGDIB	12	cg10925082	15005970	ARHGDIB_P148_R	15005977	7	No	-0.547027	<0.0001	-0.495592	<0.0001
ARHGDIB	12	cg15450139	15005977	ARHGDIB_P148_R	15005977	Direct Match	No	-0.552095	<0.0001	-0.493469	<0.0001
ARHGDIB	12	cg00512404	15005999	ARHGDIB_P148_R	15005977	22	No	-0.503822	<0.0001	-0.430274	<0.0001
BMPR1A	10	cg17776353	88506400	BMPR1A_E88_F	88506464	64	No	-0.0722902	0.0816828	-0.0620443	0.220915
BTK	X	cg03791917	100527943	BTK_P105_F	100527943	168	No	-0.248084	<0.0001	-0.177983	0.000405644
CHI3L2	1	cg01440333	111571634	CHI3L2_P226_F	111571578	56	No	-0.699763	<0.0001	-0.669836	<0.0001
DNMT3B	20	cg25803642	30813413	DNMT3B_P352_R	30813500	87	No	-0.0326538	0.432102	-0.015436	0.760923
ERCC6	10	cg04550285	50417799	ERCC6_P698_R	50417776	23	Yes	0.117005	0.00474411	0.119293	0.0182871
FZD9	7	cg20692569	72486417	FZD9_E458_F	72486503	86	Yes	-0.551634	<0.0001	-0.358164	<0.0001
IGFBP6	12	cg07927839	51777750	IGFBP6_E47_F	51777750	Direct Match	No	-0.023577	0.57061	-0.0424274	0.402795
PKD2	4	cg22426627	89147505	PKD2_P336_R	89147508	3	Yes	-0.131815	0.00145088	-0.1481	0.00333213
PKD2	4	cg07577579	89147519	PKD2_P336_R	89147508	11	Yes	-0.187593	<0.0001	-0.239416	<0.0001
PLAGL1	6	cg00702231	144371166	PLAGL1_E68_R	144371178	12	Yes	-0.20173	<0.0001	-0.138228	0.00618716
PLAGL1	6	cg12757684	144371178	PLAGL1_E68_R	144371178	Direct Match	Yes	-0.225266	<0.0001	-0.166112	0.000976955
RIPK4	21	cg11719297	42060152	RIPK4_E166_F	42060152	Direct Match	Yes	-0.4475	<0.0001	-0.457828	<0.0001
SEZ6L	22	cg16605942	24895137	SEZ6L_P299_F	24895181	44	Yes	-0.23208	<0.0001	-0.246327	<0.0001
SH3BP2	4	cg07991621	2790277	SH3BP2_E18_F	2790357	80	No	0.125041	0.00253316	0.0193658	0.702652
SH3BP2	4	cg01710886	2789505	SH3BP2_P771_R	2789568	63	Yes	0.153219	0.000209618	0.0956378	0.0588391
SH3BP2	4	cg10745272	2789568	SH3BP2_P771_R	2789568	Direct Match	Yes	0.186775	<0.0001	0.112362	0.0263009
SNURF	15	cg18506672	22751345	SNURF_P78_F	22751150	128	Yes	-0.506559	<0.0001	-0.418979	<0.0001
SPI1	11	cg07675031	47356469	SPI1_E205_F	47356469	Direct Match	Yes	-0.495683	<0.0001	-0.488092	<0.0001
TDGF1	3	cg20941258	46593672	TDGF1_P428_R	46593789	117	No	-0.143723	0.00155821	-0.140373	0.0103281
TSG101	11	cg19225095	18505285	TSG101_P257_R	18505322	37	Yes	-0.283533	<0.0001	-0.31912	<0.0001
XIST	X	cg11717280	72989343	Xist_seq_80_S95_R	72989296	Direct Match	No	-0.548906	<0.0001	-0.557743	<0.0001
Note: The TCGA determined methylation in breast tumors using the Illumina HumanMethylation 450 Beadchip panel while the present study used the Illumina GoldenGate Cancer I Panel. Only seven of the BMI-associated probes in the present study matched directly with probes in the 450 Beadchip panel (labeled as Direct Match). For the remaining BMI-associated probes, we identified probes on the 450 Bead…
CHR = Chromosome; GG = Illumina GoldenGate Cancer Panel I; TCGA = The Cancer Genome Atlas; Bold text represents a significant, inverse correlation (correlation coefficent ≤ -0.20)

## Sheet: Sheet2
Supplemental Table. Correlation between BMI-associated methylation sites (overall and among ER-positive tumors) and gene expression in breast tumors from The Cancer Genome Atlas (TCGA)
							TCGA Tumors (n = 581)
Gene ID	CHR	450K Probe ID	450K Build 36 Location	GG Probe ID	Closest GG Build 36 Location	450k bp Distance from GG Probe	Correlation	p-value	CpG Island
ABO	9	cg13506600	135140182	ABO_E110_F	135140341	159	-0.327786	<0.0001	Y
ARHGDIB	12	cg10925082	15005970	ARHGDIB_P148_R	15005977	7	-0.547027	<0.0001	N
BMPR1A	10	cg17776353	88506400	BMPR1A_E88_F	88506464	64	-0.0722902	0.0816828	N
BTK	X	cg03791917	100527943	BTK_P105_F	100527943	168	-0.248084	<0.0001	N
CHI3L2	1	cg01440333	111571634	CHI3L2_P226_F	111571578	56	-0.699763	<0.0001	N
DNMT3B	20	cg25803642	30813413	DNMT3B_P352_R	30813500	87	-0.0326538	0.432102	N
ERCC6	10	cg04550285	50417799	ERCC6_P698_R	50417776	23	0.117005	0.00474411	Y
FZD9	7	cg20692569	72486417	FZD9_E458_F	72486503	86	-0.551634	<0.0001	Y
IGFBP6	12	cg07927839	51777750	IGFBP6_E47_F	51777750	Direct Match	-0.023577	0.57061	N
PKD2	4	cg22426627	89147505	PKD2_P336_R	89147508	3	-0.131815	0.00145088	Y
PLAGL1	6	cg00702231	144371166	PLAGL1_E68_R	144371178	12	-0.20173	<0.0001	Y
RIPK4	21	cg11719297	42060152	RIPK4_E166_F	42060152	Direct Match	-0.4475	<0.0001	Y
SEZ6L	22	cg16605942	24895137	SEZ6L_P299_F	24895181	44	-0.23208	<0.0001	Y
SH3BP2	4	cg07991621	2790277	SH3BP2_E18_F	2790357	80	0.125041	0.00253316	N
SH3BP2	4	cg01710886	2789505	SH3BP2_P771_R	2789568	63	0.153219	0.000209618	Y
SNURF	15	cg18506672	22751345	SNURF_P78_F	22751150	128	-0.506559	<0.0001	Y
SPI1	11	cg07675031	47356469	SPI1_E205_F	47356469	Direct Match	-0.495683	<0.0001	Y
TDGF1	3	cg20941258	46593672	TDGF1_P428_R	46593789	117	-0.143723	0.00155821	N
TSG101	11	cg19225095	18505285	TSG101_P257_R	18505322	37	-0.283533	<0.0001	Y
XIST	X	cg11717280	72989343	Xist_seq_80_S95_R	72989296	Direct Match	-0.548906	<0.0001	N
Note: The TCGA data determined methylation in breast tumors using the Illumina HumanMethylation 450 Beadchip panel while the present study used the Illumina GoldenGate Cacner I Panel. Only seven of the BMI-associated probes in the present study matched directly with probes in the 450 Beadchip panel (labeled as Direct Match in the table). The remaining BMI-associated probes were within 200 base pa…
CHR = Chromosome; GG = Illumina GoldenGate Cancer Panel I; TCGA = The Cancer Genome Atlas; Bold text represents a significant, inverse correlation (correlation coefficent ≤ -0.20)
